# Supplementary material for: Preparation of Chitosan Molecularly Imprinted Polymers and the Recognition Mechanism for Adsorption of Alpha-Lipoic Acid
Source: MDPI journal article supplement (doi:10.3390/molecules25020312), 2020-01-13
Supplement: s1 [file s1]

Supplemental Information

# Preparation of Chitosan Molecularly Imprinted Polymers and the Recognition Mechanism for Adsorption of Alpha-Lipoic Acid

Long Xu <sup>1,2</sup>, Ze-Xin Zhao <sup>3</sup>, Yun-An Huang <sup>4</sup>, Qiu-Jin Zhu <sup>1,5\*</sup>

<sup>1</sup> School of Liquor and Food Engineering, Guizhou University, Guiyang 550025, China; xulong19891026@163.com

<sup>2</sup> School of Food Science and Engineering, South China University of Technology, Guangzhou 510640, China;

<sup>3</sup> School of Bioscience and Bioengineering, South China University of Technology, Guangzhou 510006, China; bizexin-zhao@mail.scut.edu.cn

<sup>4</sup> Department of Food Engineering, Guizhou Vocational College of Foodstuff Engineering, Guiyang 551400, China; hya127@163.com

<sup>5</sup> Key Laboratory of Agricultural and Animal Products Store and Processing of Guizhou Province, Guiyang 550025, China.

\*Correspondence: ls.qjzhu@gzu.edu.cn; Tel.: +86-851-8385-1195

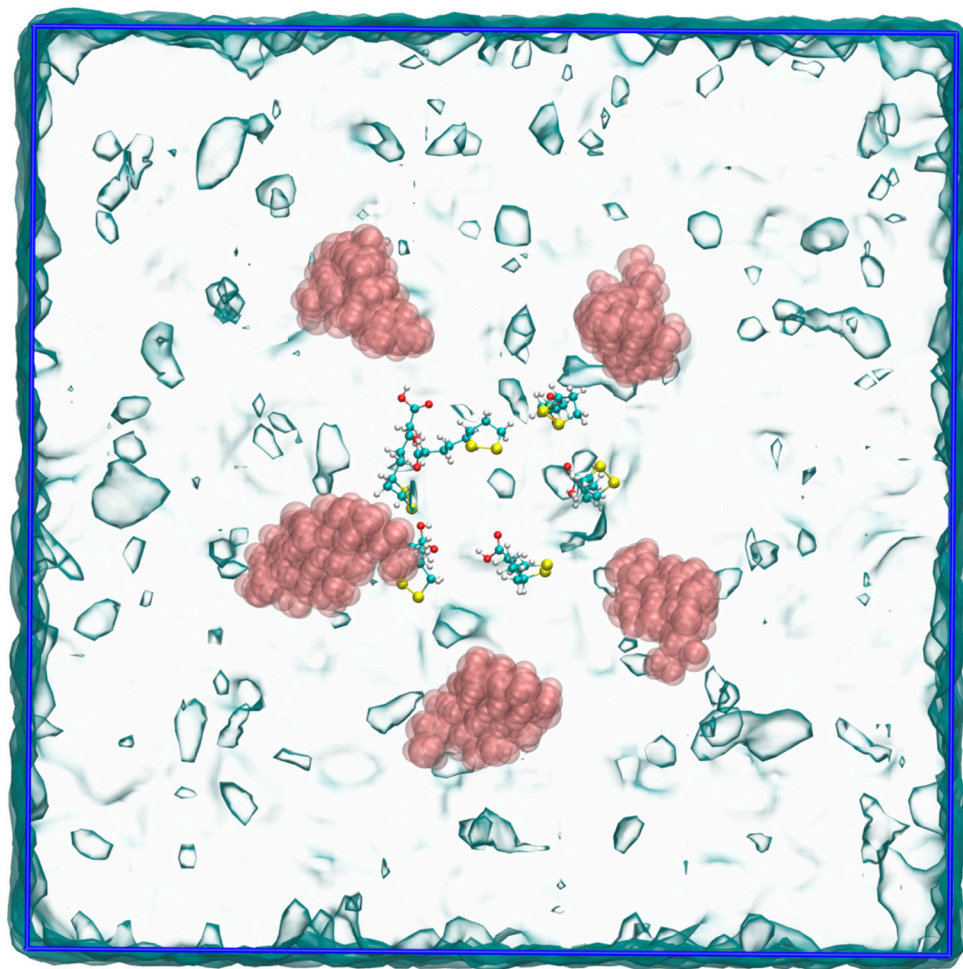

**Figure S1.** The initial model of ALAs (ball-and-stick model) and chitosan hexamers (vdW surface model) in water box.

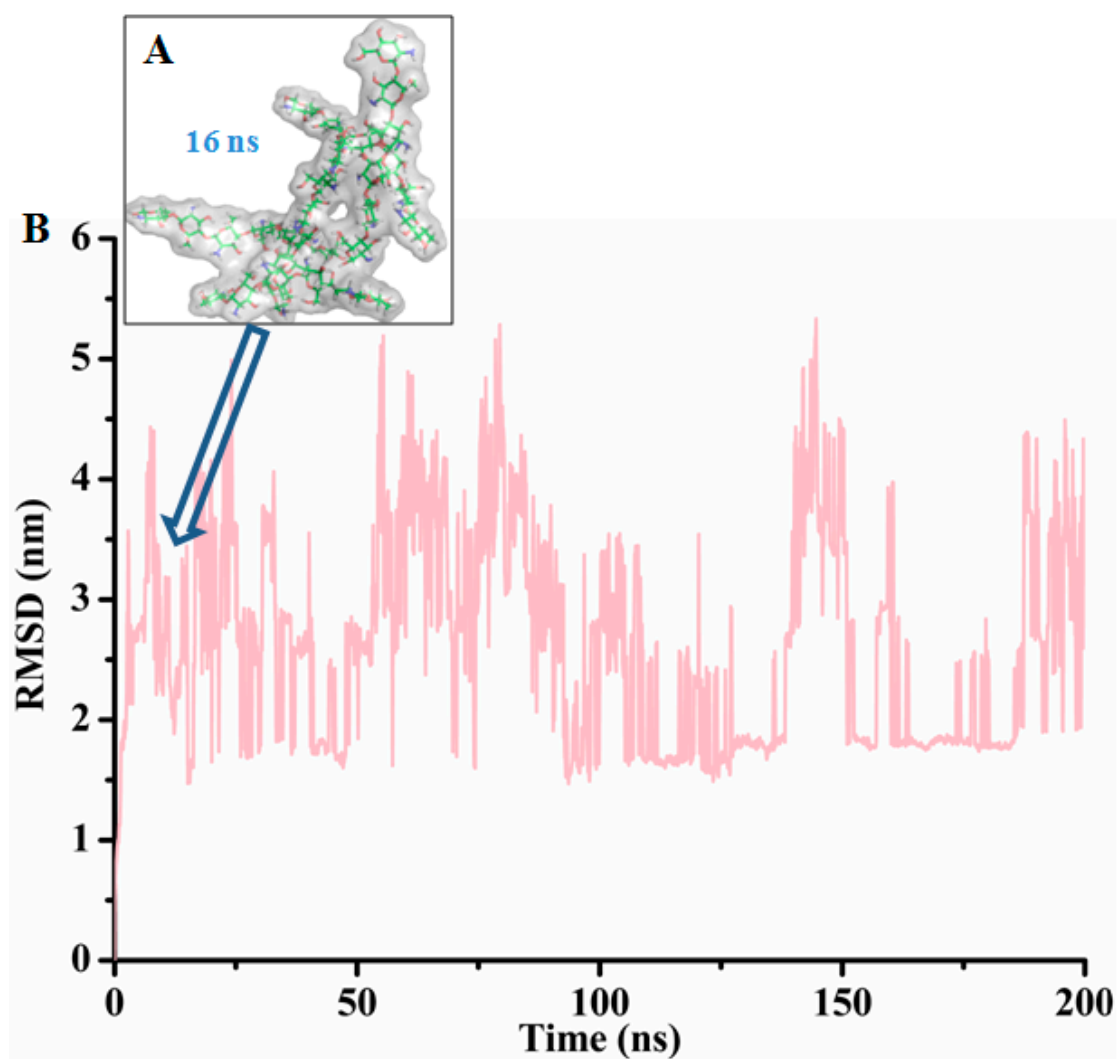

**Figure S2.** RMSD analysis. (A) The chitosan micelle model formed after 16 ns simulation time, (B) The RMSD curve of chitosan.
